# Supplementary material
Source: PubMed Central journal article supplement (PMC5898243)
Supplement: NIHMS954078-supplement-esi.pdf [file NIHMS954078-supplement-esi.pdf]

# Understanding Co-loading and Releasing of Doxorubicin and Paclitaxel using Chitosan Functionalized Single-Walled Carbon Nanotubes by Molecular Dynamics Simulations

Konda Reddy Karnati, Yixuan Wang\*

Department of Chemistry and Forensic Science, Albany State University, Albany, GA  
31705, USA

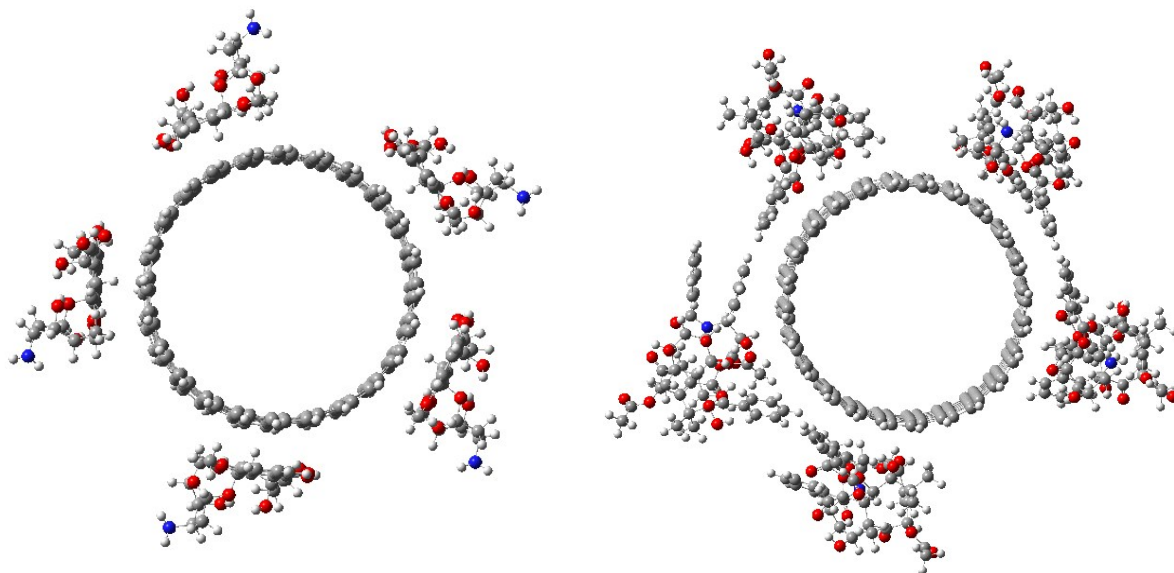

**Figure S1. Five DOX (left) and PTX (right) were binding with the sidewall of SWCNT with PM6-DH2.**

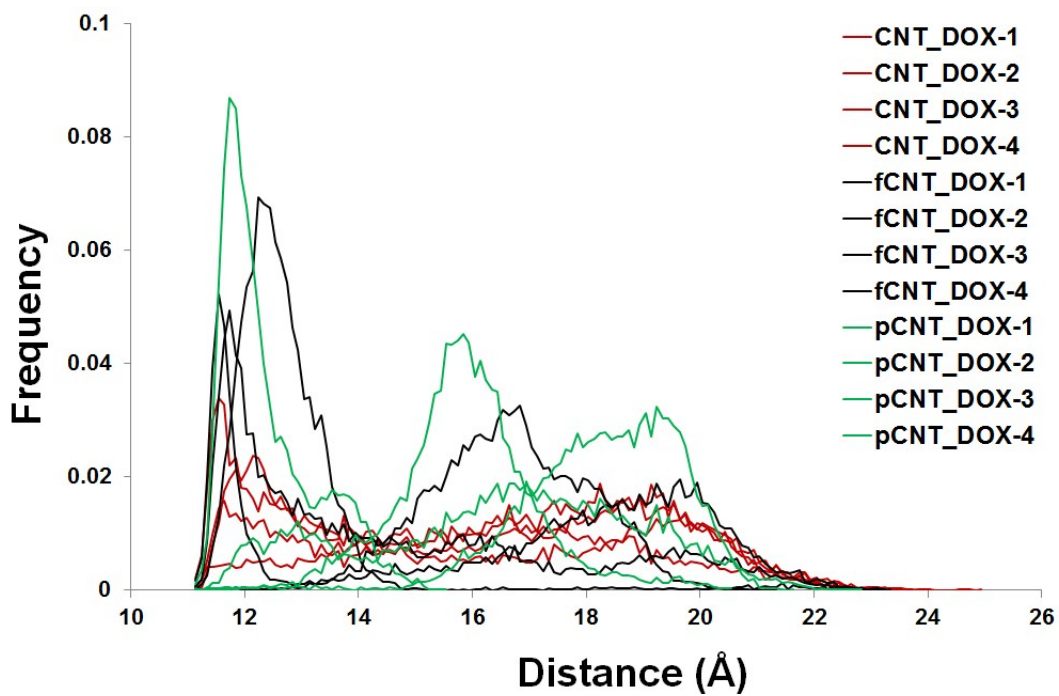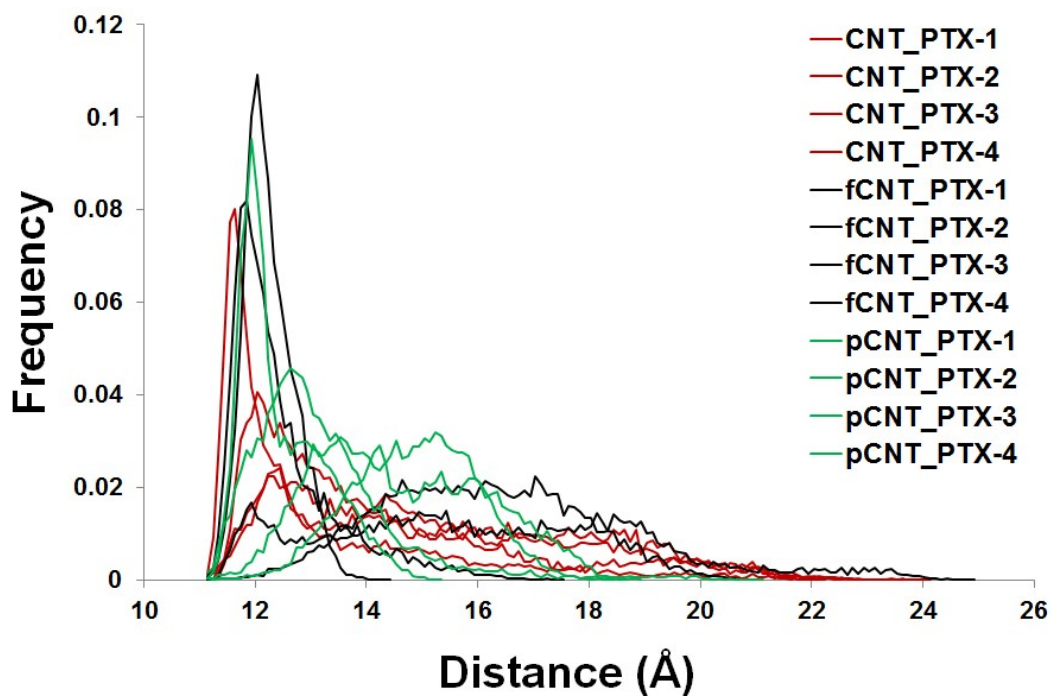

**Figure S2. Distance frequencies of DOX (top) and PTX (bottom) binding with different CNT systems.**

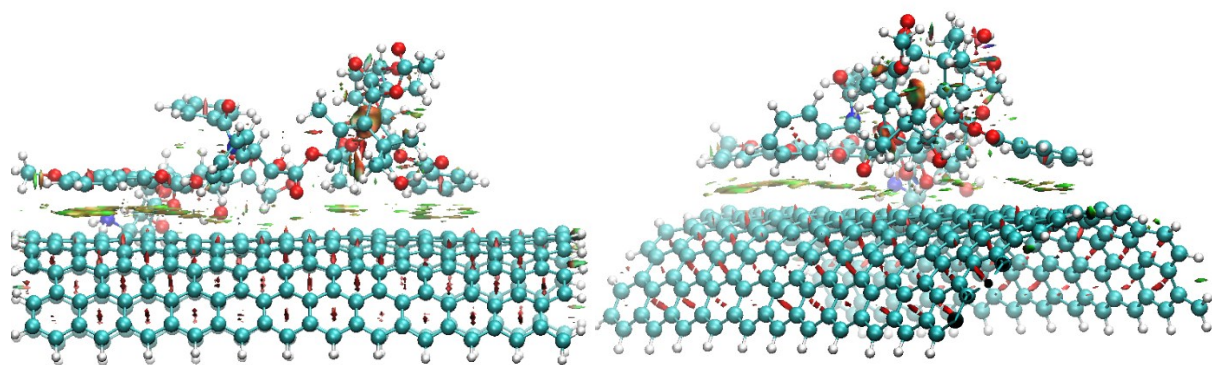

**Figure S3. Reduced density gradient isosurface (0.5 au) for pristine CNT and DOX/PTX . Green and yellow indicates vdW interaction and red strong nonbonded overlap.**

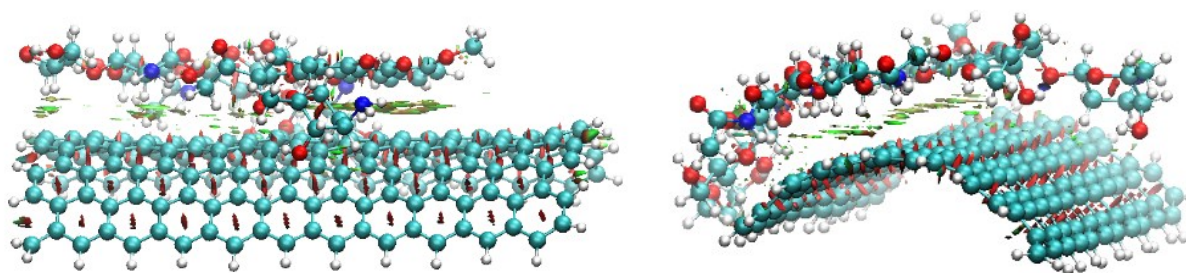

**Figure S4. Reduced density gradient isosurface (0.5 au) for functionalized CNT and DOX . Green and yellow indicates vdW interaction and red strong nonbonded overlap.**

**Table S1.  $\Delta H$ ,  $-T\Delta S$ ,  $\Delta G$  (Kcal/mol) for the binding of *f*-SWCNT with DOX and PTX molecules.**

|              | $\Delta H$ | $-T\Delta S$ | $\Delta G$ |
|--------------|------------|--------------|------------|
| <b>DOX-1</b> | -36.03     | 44.75        | 8.71       |
| <b>DOX-2</b> | -36.59     | 42.48        | 5.94       |
| <b>DOX-3</b> | -35.73     | 43.22        | 7.49       |
| <b>DOX-4</b> | -36.80     | 46.59        | 9.79       |
| <b>PTX-1</b> | -42.83     | 67.83        | 25.0       |
| <b>PTX-2</b> | -35.58     | 64.43        | 28.84      |
| <b>PTX-3</b> | -46.01     | 65.93        | 19.92      |
| <b>PTX-4</b> | -38.87     | 63.10        | 24.22      |

**Table S2.  $\Delta H$ ,  $-T\Delta S$ ,  $\Delta G$  (Kcal/mol) for the binding of P-*f*-SWCNT with DOX and PTX molecules.**

|              | $\Delta H$ | $-T\Delta S$ | $\Delta G$ |
|--------------|------------|--------------|------------|
| <b>DOX-1</b> | -37.53     | 45.14        | 1.52       |
| <b>DOX-2</b> | -31.40     | 45.49        | 14.09      |
| <b>DOX-3</b> | -30.35     | 44.82        | 14.47      |
| <b>DOX-4</b> | -29.99     | 44.41        | 14.41      |
| <b>PTX-1</b> | -35.67     | 66.31        | 30.64      |
| <b>PTX-2</b> | -31.01     | 63.93        | 32.92      |
| <b>PTX-3</b> | -38.72     | 65.18        | 26.46      |
| <b>PTX-4</b> | -33.11     | 70.32        | 37.21      |

**Table S3.  $\Delta H$ ,  $-T\Delta S$ ,  $\Delta G$  (Kcal/mol) for the binding *f*-SWCNT with two encapsulated DOX (DOX-1 and DOX-2), two DOX and four PTX molecules on surface of SWCNT.**

|              | $\Delta H$ | $-T\Delta S$ | $\Delta G$ |
|--------------|------------|--------------|------------|
| <b>DOX-1</b> | -64.01     | 36.68        | -27.34     |
| <b>DOX-2</b> | -54.38     | 35.27        | -19.11     |
| <b>DOX-3</b> | -38.07     | 46.54        | 8.47       |
| <b>DOX-4</b> | -37.61     | 41.13        | 3.52       |
| <b>PTX-1</b> | -45.88     | 62.68        | 16.79      |
| <b>PTX-2</b> | -40.88     | 63.96        | 23.08      |
| <b>PTX-3</b> | -35.94     | 67.16        | 31.22      |
| <b>PTX-4</b> | -40.55     | 65.99        | 25.45      |
